# Supplementary material for: Brain-Age Prediction Using Shallow Machine Learning: Predictive Analytics Competition 2019
Source: PubMed Central journal article supplement (PMC7738323; doi:10.3389/fpsyt.2020.604478), 2020-12-02
Supplement: Table_1.pdf [file Table_1.pdf]

## Supplementary Material

| Algorithms                                                           | Sklearn Implementation    |
|----------------------------------------------------------------------|---------------------------|
| Principle Component Analysis                                         | PCA                       |
| Fast algorithm for Independent Component Analysis                    | FastICA                   |
| Select the p-values corresponding to Family-wise error rate          | SelectFwe                 |
| Select features according to a percentile of the highest scores      | SelectPercentile          |
| Remove low-variance Features                                         | VarianceThreshold         |
| Agglomerate features                                                 | FeatureAgglomeration      |
| Elastic Net model with iterative fitting along a regularisation path | ElasticNetCV              |
| Randomised Decision Trees on sub-samples of the dataset              | ExtraTreesRegressor       |
| k-Nearest Neighbours Regression                                      | KNeighborsRegressor       |
| Cross-validated Lasso using the LARS algorithm                       | LassoLarsCV               |
| Linear Support Vector Regression                                     | LinearSVR                 |
| Linear Least squares with l2 regularisation                          | Ridge                     |
| Gaussian process regression                                          | GaussianProcessRegressors |
| Random Forest Regressor                                              | RandomForrestRegressor    |
| Ordinary Least Squares Linear Regression                             | LinearRegression          |
| Decision Tree Regressor                                              | DecisionTreeRegressor     |
| Relevance Vector Regression                                          | RVR*                      |

**Table S1.** List of models available for TPOT.

\* : The RVR algorithm is not part of the Sklearn library. The algorithm used here was provided <https://github.com/JamesRitchie/scikit-rvm>
